# Supplementary material for: Elongation/Termination Factor Exchange Mediated by PP1 Phosphatase Orchestrates Transcription Termination
Source: PubMed Central journal article supplement (PMC6180485; doi:10.1016/j.celrep.2018.09.007), 2018-10-02
Supplement: mmc1.pdf [file mmc1.pdf]

**Cell Reports, Volume 25**

**Supplemental Information**

**Elongation/Termination Factor Exchange**

**Mediated by PP1 Phosphatase Orchestrates**

**Transcription Termination**

**Tea Kecman, Krzysztof Kuś, Dong-Hyuk Heo, Katie Duckett, Adrien Birot, Sabrina Liberatori, Shabaz Mohammed, Lucia Geis-Asteggiane, Carol V. Robinson, and Lidia Vasiljeva**

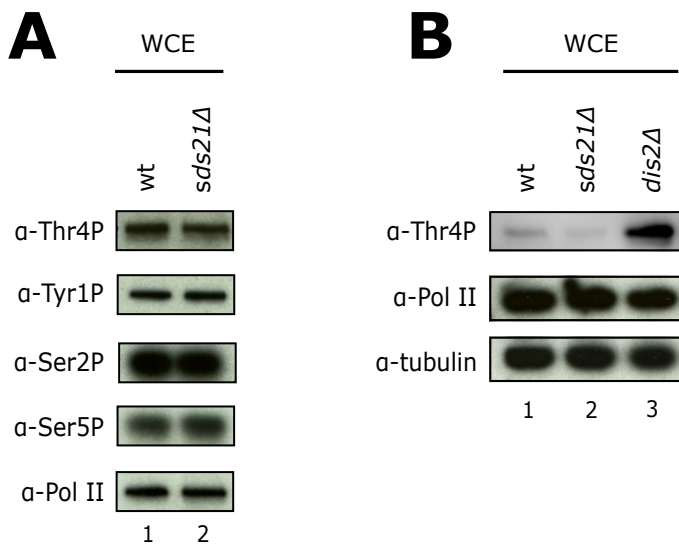

**Figure S1. Sds21 is not a CTD-phosphatase, Related to Figure 2**

(A-B) Whole cell extract levels of phospho-Pol II were analysed by Western blot using the indicated antibodies in wt, *sds21Δ* and *dis2Δ* strains.

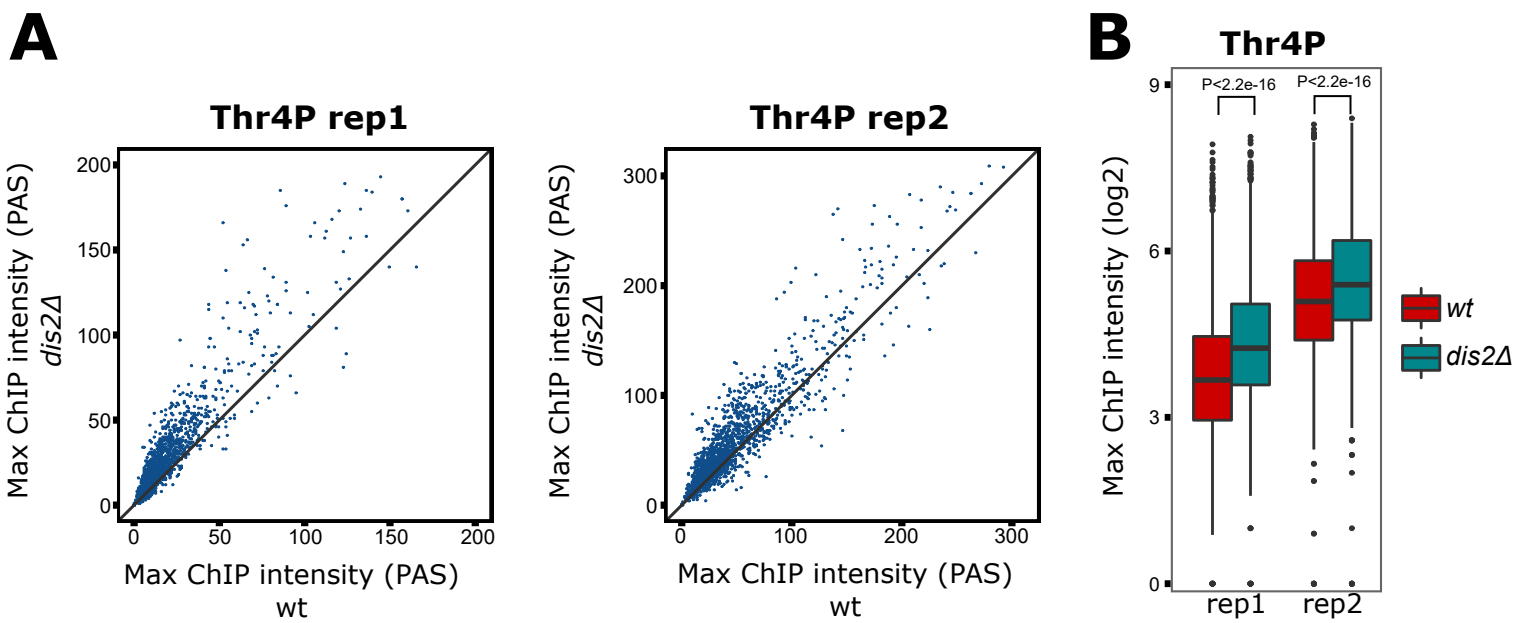

**Figure S2. Thr4 ChIP-seq analysis, Related to Figure 3**

(A) Scatterplot of Thr4P ChIP signal intensities in *wt* versus *dis2Δ* over a set of 1735 representative non-overlapping protein-coding genes (see Methods). Duplicate data is presented. Each point corresponds to the spike-in normalized maximum ChIP signal intensity for each gene downstream the PAS. (B) Quantitation (boxplots) of Thr4P signal intensities from (A). Duplicate data is presented. p-values (two-sided Wilcoxon rank-sum test) were calculated to test the significance of the difference between *wt* and *dis2Δ*.

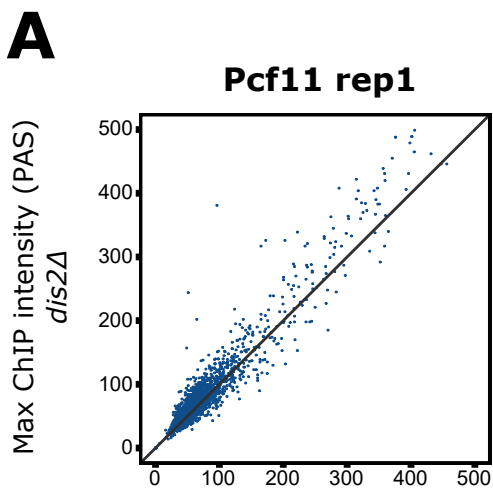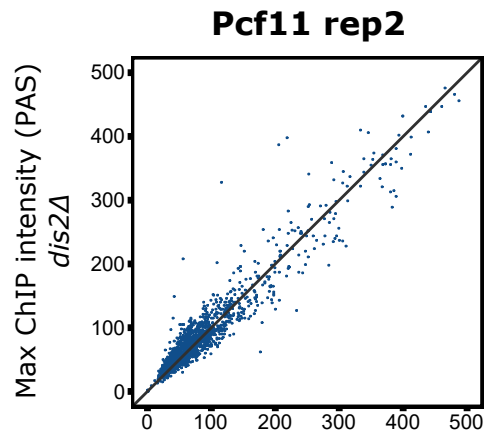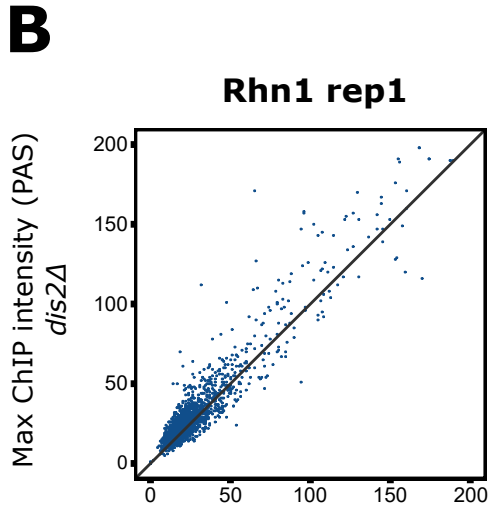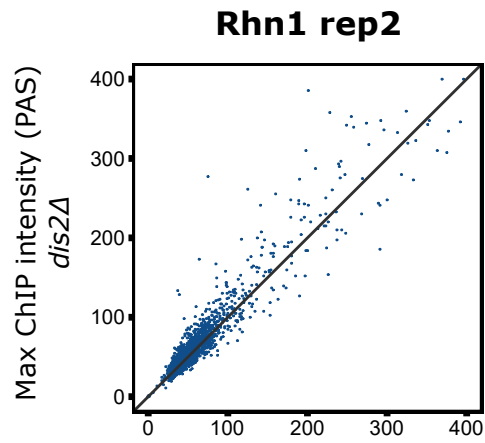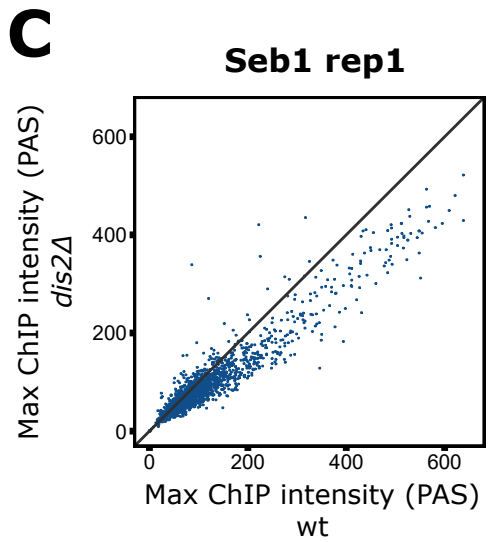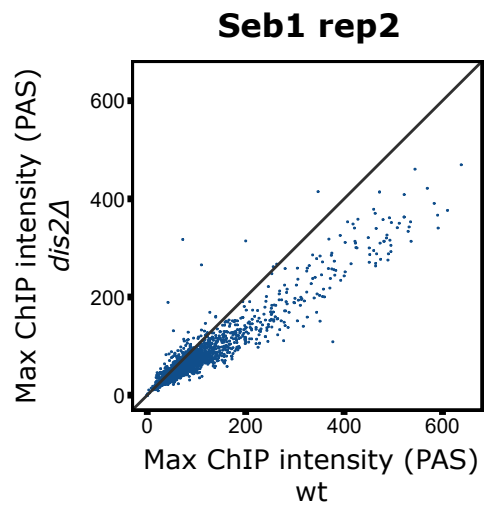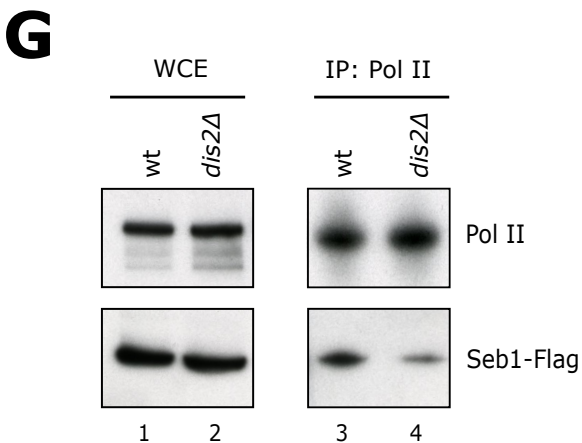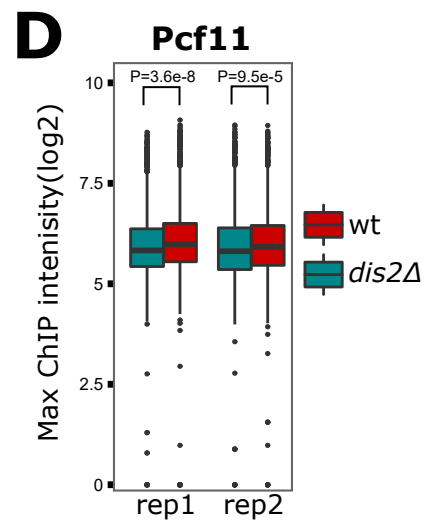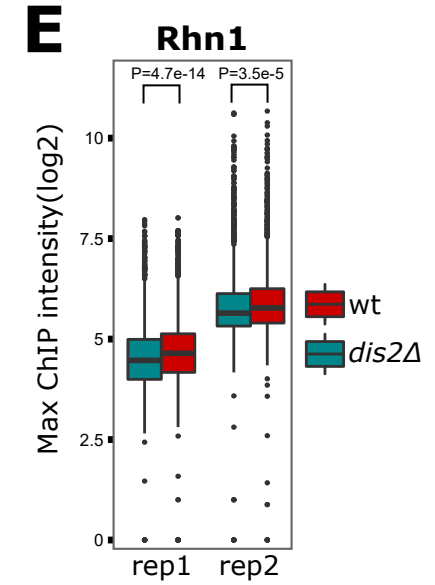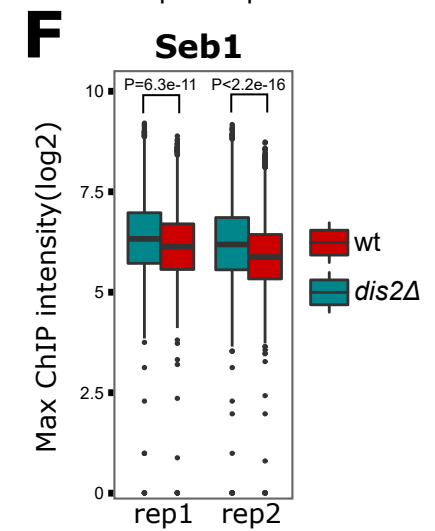

**Figure S3. Pcf11, Rhn1 and Seb1 ChIP-seq analysis, Related to Figure 4**

(A-C) Scatterplot of Pcf11, Rhn1 and Seb1 ChIP signal intensities in wt and *dis2Δ*. Duplicate data is presented. Protein-coding genes for analysis were selected as above (n=1735). The maximum ChIP signal intensity was calculated for each gene downstream the PAS. (D-F) Quantitation (box plots) of Pcf11, Rhn1 and Seb1 ChIP signal intensities from (A-C). Duplicate data is presented. p-values (two-sided Wilcoxon rank-sum test) were calculated to test the significance of the difference between wt and *dis2Δ*. (G) Binding of Seb1-Flag to Pol II in wt and *dis2Δ* was determined by immunoprecipitation of Pol II (8WG16), followed by Western blotting with anti-Pol II and Flag antibodies.

**A**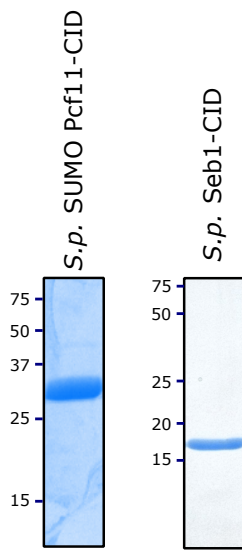**B**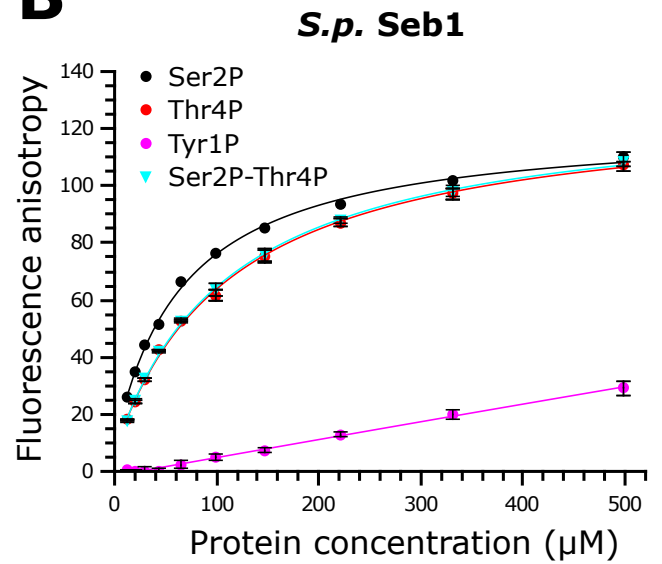**C**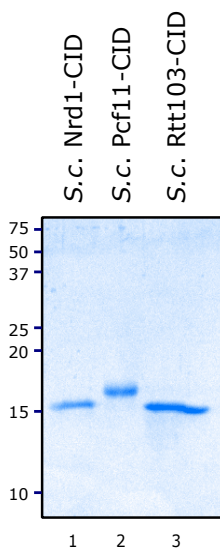**D**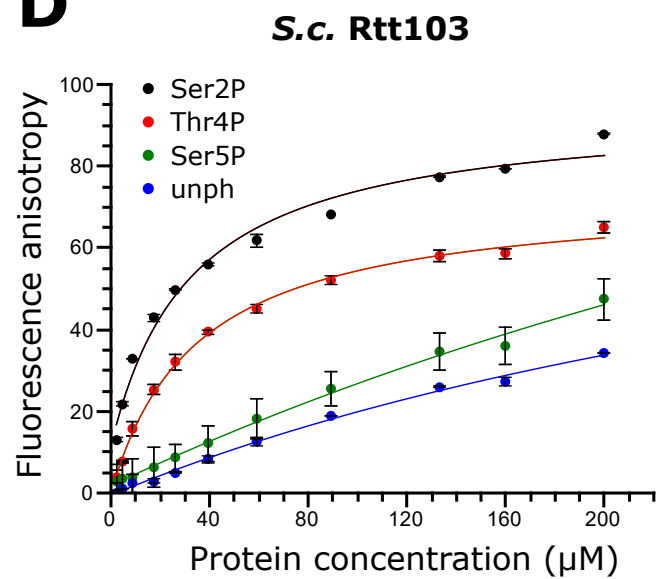**E**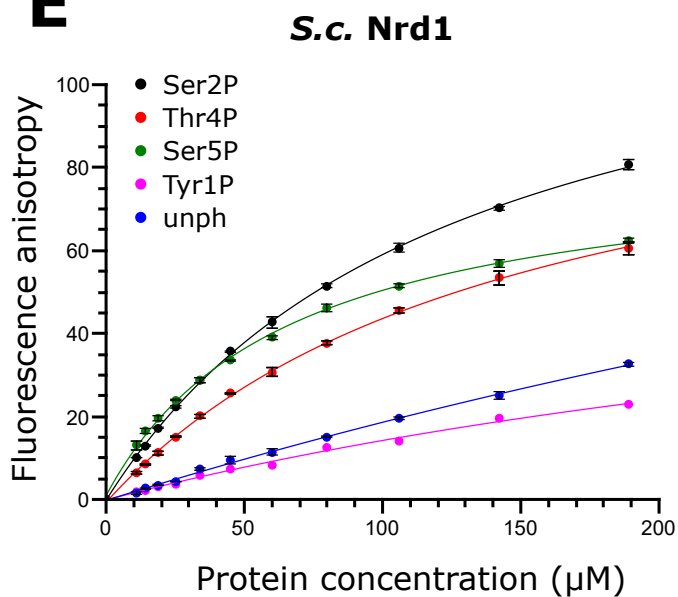**F**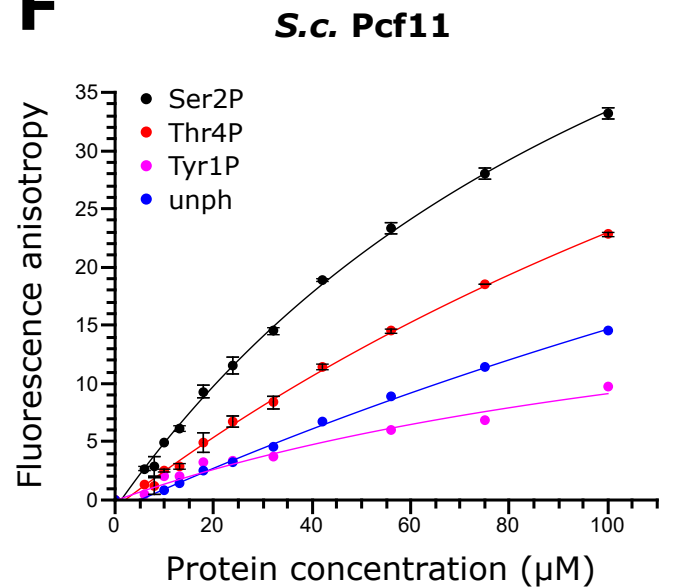

**Figure S4. Fluorescence anisotropy (FA) assay for yeast termination factors. Related to Figure 4**  
**(A)** SDS-PAGE showing the preparations for *S.pombe* SUMO Pcf11-CID and Seb1-CID. **(B)** Binding of *S. pombe* Seb1 to a FAM-tagged two-repeat Ser2P-Thr4P phosphorylated CTD peptide measured by FA (for Ser2P,  $K_d=67.8 \pm 6.8 \mu\text{M}$ ; Thr4P,  $K_d=114.2 \pm 8.4 \mu\text{M}$ ; Ser2P+Thr4P,  $K_d=112.3 \pm 6.6 \mu\text{M}$ ). **(C)** SDS-PAGE showing the preparations for *S. cerevisiae* Rtt103-CID, Nrd1-CID and Pcf11-CID that were utilised for FA assays. **(D-F)** FA assay for *S. cerevisiae* CID containing factors from (C). Error bars show the standard deviation of two technical repeats.

**A**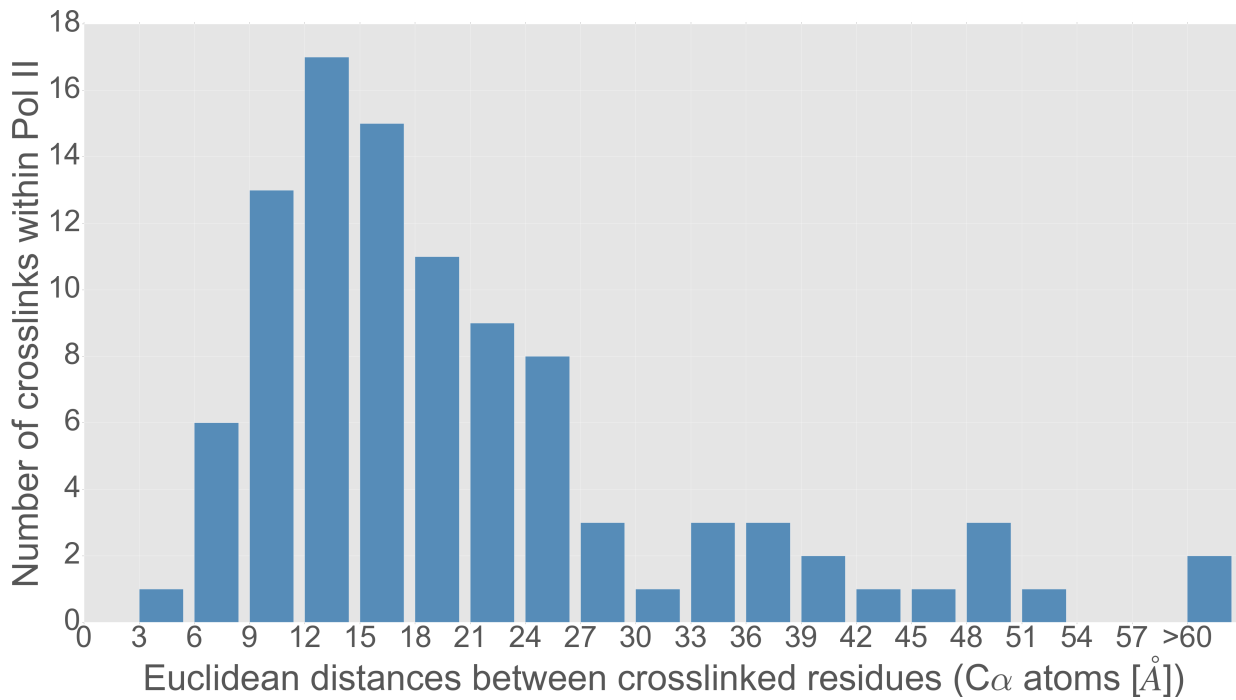**B**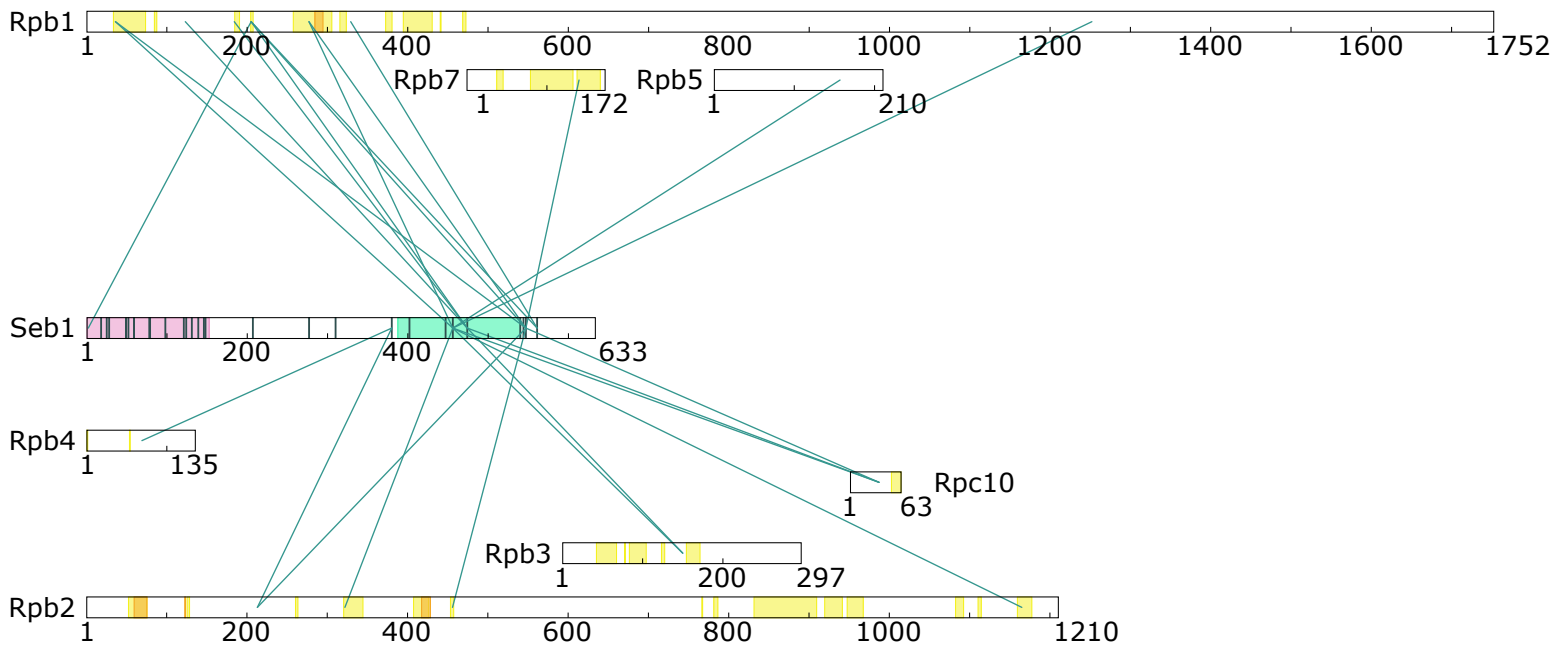

**Figure S5. Cross-linking data validation based on Pol II structure, Related to Figure 5**

**(A)** Histogram of distances between C $\alpha$  atoms of cross-linked residues within Pol II structure (PDB ID: 3H0G). **(B)** Schematic map of the identified lysine-lysine cross-links of the Pol II-Seb1 complex. Lysines of Seb1 are represented as vertical lines. CID and RRM domains of Seb1 are highlighted in pink and green colour, respectively. Regions of predicted contact between fission yeast Pol II and Spt4 and 5 are depicted as orange and yellow boxes.



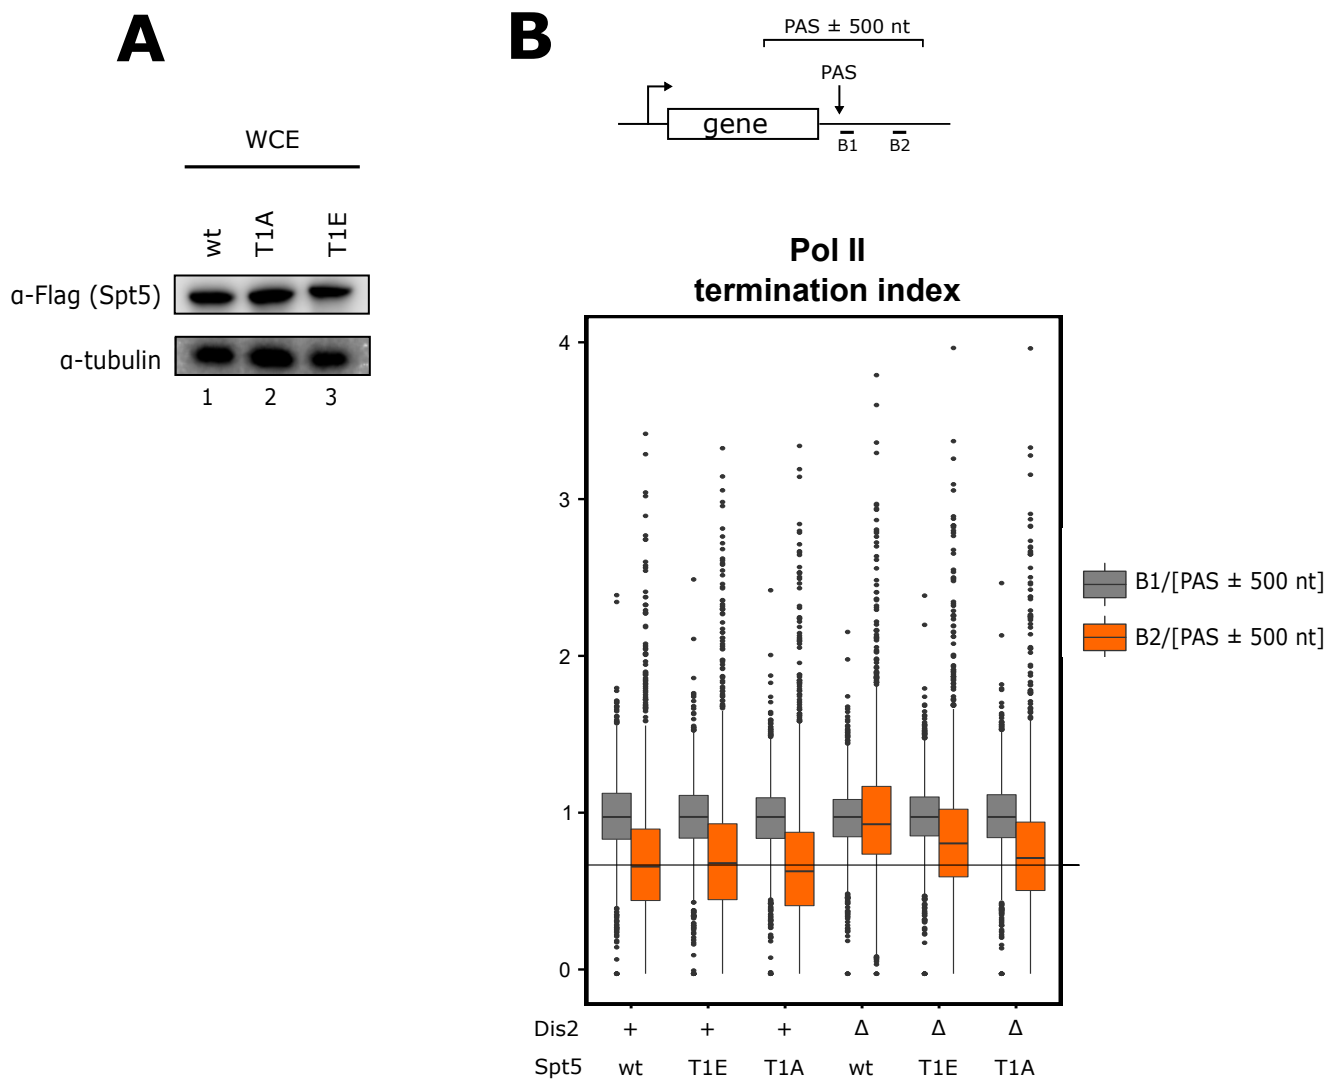

**Figure S6. Read-through analysis in *spt5* mutants, Related to Figure 6**

(A) Western blot analysis of *spt5* wt/T1A/T1E in whole cell extract. (B) Pol II termination index was determined by dividing mapped reads in window B1 or B2 by the read count within [PAS ±500 nt]. Protein-coding genes for analysis were selected as above (n=1735). B1 corresponds to the region from PAS to PAS+50 nt. B2 corresponds to the region from PAS+350 nt to PAS+400 nt.

**Table S1:  $K_d$  values of CID–CTD interactions, Related to Figure 4 and S4.**

|                       | $K_d$ ( $\mu\text{M}$ ) |                  |                  |                   |                    |
|-----------------------|-------------------------|------------------|------------------|-------------------|--------------------|
|                       | <i>S.p.</i> Pcf11       | <i>S.p.</i> Seb1 | <i>S.c.</i> Nrd1 | <i>S.c.</i> Pcf11 | <i>S.c.</i> Rtt103 |
| Double-repeated Ser2P | 48.1 $\pm$ 2.7          | 72.3 $\pm$ 6.4   | 126 $\pm$ 4      | 127 $\pm$ 15      | 32.3 $\pm$ 6.8     |
| Double-repeated Thr4P | 51.1 $\pm$ 5.2          | 153.2 $\pm$ 12.1 | 148 $\pm$ 7      | 269 $\pm$ 57      | 34.8 $\pm$ 3.2     |
| Double-repeated Ser5P | -                       | 280.9 $\pm$ 23.1 | 65.8 $\pm$ 3     | -                 | >1000              |

**Table S3: Yeast strains used in this study, Related to STAR Methods.**

| Strain name | Organism       | Genotype                                                                                                                         | Reference                                  |
|-------------|----------------|----------------------------------------------------------------------------------------------------------------------------------|--------------------------------------------|
| YP144       | <i>S.pombe</i> | h+, leu1-32, ura4-Δ18, ade6-M216; his3Δ::1                                                                                       | Lemieux et al., 2011                       |
| YP602       | <i>S.pombe</i> | h+, leu1-32, ura4-Δ18, ade6-M216; his3Δ::1; Rpb9-3xFLAG::kanMX; Rpb1-TEV-CTD (a TEV cleavage site was inserted upstream the CTD) | This study                                 |
| YP606       | <i>S.pombe</i> | h-, leu1; ura4; dis2::ura4+                                                                                                      | National BioResource Project (NBRP), Japan |
| YP611       | <i>S.pombe</i> | h-; leu1; dis2-11                                                                                                                | National BioResource Project (NBRP), Japan |
| YP637       | <i>S.pombe</i> | h+; leu1-32; ura4-Δ18; ade6-M216; his3Δ::1; Rpb9-3xFLAG::kanMX                                                                   | This study                                 |
| YP732       | <i>S.pombe</i> | h+; leu1-32; ura4-Δ18; ade6-M216; his3Δ::1; dis2::ura4+                                                                          | This study                                 |
| YP781       | <i>S.pombe</i> | h+; leu1-32; ura4-Δ18; ade6-M216; his3Δ::1; Seb1-3XHA-TAP::kanMX                                                                 | This study                                 |
| YP782       | <i>S.pombe</i> | h+; leu1-32; ura4-Δ18; ade6-M216; his3Δ::1; dis2::ura4+; Seb1-3XHA-TAP::kanMX                                                    | This study                                 |
| YP783       | <i>S.pombe</i> | h+; leu1-32; ura4-Δ18; ade6-M216; his3Δ::1; Pcf11-TAP::kanMX                                                                     | This study                                 |
| YP784       | <i>S.pombe</i> | h+; leu1-32; ura4-Δ18; ade6-M216; his3Δ::1; dis2::ura4+; Pcf11-TAP::kanMX                                                        | This study                                 |
| YP822       | <i>S.pombe</i> | h+; leu1-32; ura4-Δ18; ade6-M216; his3Δ::1; Rhn1-3XHA-TAP::kanMX                                                                 | This study                                 |
| YP823       | <i>S.pombe</i> | h+; leu1-32; ura4-Δ18; ade6-M216; his3Δ::1; dis2::ura4+; Rhn1-3XHA-TAP::kanMX                                                    | This study                                 |
| YP839       | <i>S.pombe</i> | h+; leu1-32; ura4-Δ18; ade6-M216; his3Δ::1; Seb1-3XFlag::kanMX                                                                   | This study                                 |
| YP840       | <i>S.pombe</i> | h+; leu1-32; ura4-Δ18; ade6-M216; his3Δ::1; dis2::ura4+; Seb1-3XFlag::kanMX                                                      | This study                                 |
| YP910       | <i>S.pombe</i> | h+; leu1-32; ura4-Δ18; ade6-M216; his3Δ::1; Seb1-3XHA-TAP::kanMX; Spt5-wt-3xFlag::natMX                                          | This study                                 |
| YP911       | <i>S.pombe</i> | h+; leu1-32; ura4-Δ18; ade6-M216; his3Δ::1; Seb1-3XHA-TAP::kanMX; Spt5-T1E-3xFlag::natMX                                         | This study                                 |
| YP912       | <i>S.pombe</i> | h+; leu1-32; ura4-Δ18; ade6-M216; his3Δ::1; Seb1-3XHA-TAP::kanMX; Spt5-T1A-3xFlag::natMX                                         | This study                                 |
| YP913       | <i>S.pombe</i> | h+; leu1-32; ura4-Δ18; ade6-M216; his3Δ::1; dis2::ura4+; Seb1-3XHA-TAP::kanMX; Spt5-wt-3xFlag::natMX                             | This study                                 |
| YP914       | <i>S.pombe</i> | h+; leu1-32; ura4-Δ18; ade6-M216; his3Δ::1; dis2::ura4+; Seb1-3XHA-TAP::kanMX; Spt5-T1E-3xFlag::natMX                            | This study                                 |
| YP915       | <i>S.pombe</i> | h+; leu1-32; ura4-Δ18; ade6-M216; his3Δ::1; dis2::ura4+; Seb1-3XHA-TAP::kanMX; Spt5-T1A-3xFlag::natMX                            | This study                                 |
| YP956       | <i>S.pombe</i> | h+; leu1-32; ura4-Δ18; ade6-M216; his3Δ::1; Spt5-wt-3xFlag::natMX                                                                | This study                                 |
| YP957       | <i>S.pombe</i> | h+; leu1-32; ura4-Δ18; ade6-M216; his3Δ::1; Spt5-T1A-3xFlag::natMX                                                               | This study                                 |
| YP958       | <i>S.pombe</i> | h+; leu1-32; ura4-Δ18; ade6-M216; his3Δ::1; Spt5-T1E-3xFlag::natMX                                                               | This study                                 |
| YP959       | <i>S.pombe</i> | h+; leu1-32; ura4-Δ18; ade6-M216; his3Δ::1; dis2::ura4+; Spt5-wt-3xFlag::natMX                                                   | This study                                 |
| YP960       | <i>S.pombe</i> | h+; leu1-32; ura4-Δ18; ade6-M216; his3Δ::1; dis2::ura4+; Spt5-T1A-3xFlag::natMX                                                  | This study                                 |
| YP961       | <i>S.pombe</i> | h+; leu1-32; ura4-Δ18; ade6-M216; his3Δ::1; dis2::ura4+; Spt5-T1E-3xFlag::natMX                                                  | This study                                 |
| YP1029      | <i>S.pombe</i> | h-/h+; ade6-M210/ade6-M216; arg3-Δ4/arg3-Δ4; ura4-Δ18/ura4-Δ18; his3-Δ1/his3-Δ1; rpb1-wt/rpb1-T4A-KanMX6                         | This study                                 |

|        |                     |                                                                                                             |                              |
|--------|---------------------|-------------------------------------------------------------------------------------------------------------|------------------------------|
| YP1083 | <i>S.pombe</i>      | h-/h+; ade6-M210/ade6-M216; arg3-Δ4/arg3-Δ4; ura4-Δ18/ura4-Δ18;<br>his3-Δ1/his3-Δ1; rpb1-wt/rpb1-T4E-KanMX6 | This study                   |
| YF336  | <i>S.cerevisiae</i> | MATa; his3Δ1; leu2Δ0; met15Δ0; ura3Δ0                                                                       | Kim et al., 2004             |
| YF1429 | <i>S.cerevisiae</i> | MATa; his3Δ1; leu2Δ0; met15Δ0; ura3Δ0; Pcf11-TAP::His3                                                      | Ghaemmaghami et al.,<br>2003 |
